# Supplementary material for: Effect of mobile application-based versus DVD-based CPR training on students’ practical CPR skills and willingness to act: a cluster randomised study
Source: PubMed Central journal article supplement — BMJ Open. 2016 Apr 29;6(4):e010717. doi: 10.1136/bmjopen-2015-010717 (PMC4853996; doi:10.1136/bmjopen-2015-010717), 2016-04-29
Supplement: bmjopen-2015-010717supp_file-1.pdf [file bmjopen-2015-010717supp_file-1.pdf]

## Supplementary file: the modified Cardiff test.

The modified version of the Cardiff test,[21], adapted to the ERC guidelines of 2010,[18]. The duration of the practical test was 3 minutes. The optimal conduct was 30 seconds for check responsiveness, check respiration and call for help, followed by 2.5 minutes of CPR. During the CPR, the participants were expected to perform at least 5 cycles of 30 compressions and 2 ventilations (30:2). The rules of assessment were pre-specified as follows:

Check responsiveness by talking

2. Yes, if some form of verbal communication as “are you ok” or “how are you”?

1. No, if no attempt at verbal communication was performed

Method: direct observation and real-time registration in the observation schedule by the test leader.

Check responsiveness by shaking

3. Yes, if the rescuer gently shake the victim shoulders.

2. No, if no attempt to shake the victim shoulders occurred.

1. Potentially dangerous, if the rescuer violently shakes the victim’s shoulders so the head lifted up and down against the ground, which can damage the head or the neck.

Method: direct observation and real-time registration in the observation schedule by the test leader.

Open the airway - chin lift, head tilt.

5. Perfect, if one hand on the forehead, two fingertips on the jawbone (not soft tissue) and gently lifted the chin and bent the head back ie by ERC guidelines.

4 Acceptable/partially correct if several indicators are performed, but not all.

3. Attempted other, if the rescuer tried in other ways than ERC recommendation.

2. Only one element is performed or if the rescuer tries but fails.

1. No, if no attempt to open the airway was performed.

Method: direct observation and real-time registration in the observation schedule by the test leader.

Checks respiration - see, listen, feel

2. Yes, if the rescuer did attempts of breath control, even if not all three actions see, listen and feel were performed and although if the total time of the control was less than 10 seconds.

1. No, if no attempt to check for breathing was performed.

Method: direct observation and real-time registration in the observation schedule by the test leader.

Dials 112

2. Yes, dials 112 within the first minute. A call for help without dialling 112 was not enough, since students were instructed they were alone at the site.

1. No, if no attempt to get help was performed.

Method: direct observation and real-time registration in the observation schedule by the test leader.

Compression/ventilation ratio

4. 30:2 (28-32:2), if the rescuer practical applied compressions and ventilations with the relationship 28-32:2 during the whole test. Participants unable to ventilate the manikin but who attempted a ratio of 28-32:2 were registered as such, as they apparently had learned the skill ratio.

3. Other ratio, if the rescuer applied different ratio of compressions and ventilations than 28-32:2.

2. Compressions only.

1. Ventilations only.

Method: Direct observation and real-time registration in combination with data from Laerdal PC Skill Reporter Systems transferred to the scoring sheet after the test.

Hand-position during compression

Incorrect hand-position was recorded if one compression was in the wrong place, since one wrong compression can cause rib fracture or fracture the xiphoid process of sternum.

4. Correct, if the rescuer place the heel of one hand in the centre of the victim’s chest and with the other hand above.

3. Other wrong, if the rescuer performs chest compressions too high up on the sternum or to the side of the sternum.

2. Too low, if the rescuer performs chest compressions too low on the sternum.

1. Not attempted, if no compressions were performed.

Method: Data from Laerdal PC Skill Reporter Systems was transferred to a scoring sheet after the test.

#### Average compression depth

The PC Skill Reporter system version 2.4 measures up to 60 mm compression depth. To avoid that those who compress >60 mm obtain the highest score, highest score was given for an average compression depth of 50-59 mm. Those who compressed  $\geq 60$  mm received 5 points. We chose to retain the 6-point scale, as in previous studies,[23] even though no one could receive 3 points, which would corresponded to a > 65 mm compression depth.

6. 50-59 mm.
5.  $\geq 60$  mm
4. 35-49 mm
2. 1-34 mm
1. Not attempted, if no compressions were performed.

Method: Data from Laerdal PC Skill Reporter Systems was transferred to a scoring sheet after the test.

#### Total compression counted

6. 140-190
5.  $\geq 191$
4. 121-139
3. 81-120
2. 1-80
1. Not attempted, if no compressions were performed.

Method: Data from Laerdal PC Skill Reporter Systems was transferred to a scoring sheet after the test.

#### Average ventilation volume

5. 500-600 ml
4. 1-499 ml
3.  $\geq 601$  ml
2. 0 ml, if the rescuer tried to do rescue breaths but failed.
1. Not attempted, if no rescue breaths were performed.

Method: Direct observation and real-time registration if the rescuer tried to do rescue breath. Exact volume, from Laerdal PC Skill Reporter Systems, was transferred to the scoring sheet after the test.

#### Total ventilation counted

5. 8-12
4. 1-7
3.  $\geq 13$
2. 0, if the rescuer tried to do rescue breaths but failed.
1. Not attempted, if no rescue breaths were performed.

Method: Direct observation and real-time registration if the rescuer tried to do rescue breath. Exact number, from Laerdal PC Skill Reporter Systems, was transferred to the scoring sheet after the test.

#### Total "hands-off" time

Total hands-off time was the total time when compressions were not being performed (i.e. also includes time for check responsiveness, check respiration and dial 112).

4. 0-60 s
3. 61-90 s
2. 91-135 s
1. 136-180 s

Method: Data from Laerdal PC Skill Reporter Systems was transferred to a scoring sheet after the test.
